# Supplementary material
Source: PubMed Central journal article supplement (PMC7965123)
Supplement: 3228_materials.pdf [file 3228_materials.pdf]

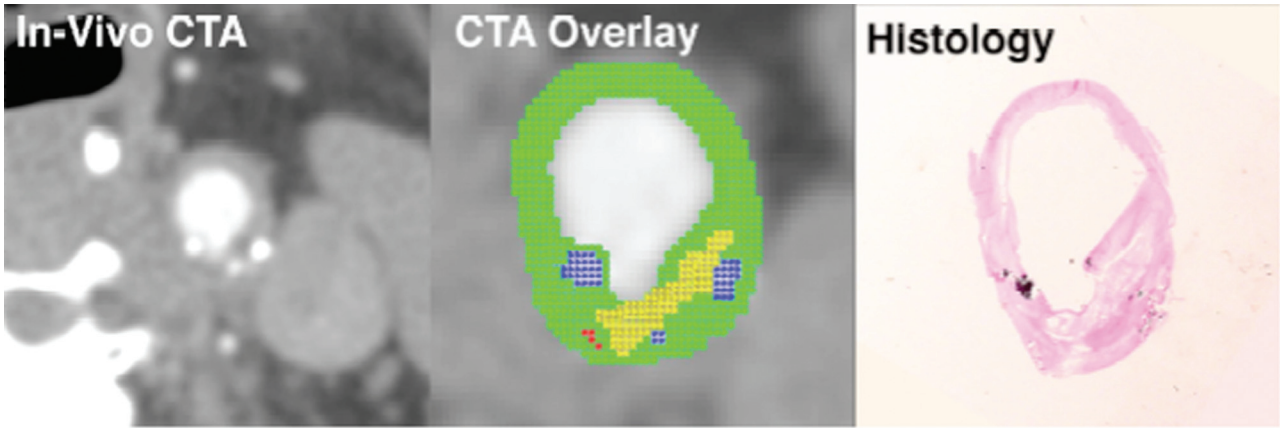

**On-line Fig 1.** Illustration of the custom CT-based, automated classifier computer algorithm that was used in this project to characterize carotid artery plaque CT features (adjusted from Wintermark et al<sup>23</sup>). Lipid clusters were depicted in *yellow*, blood products in *red*, calcification in *blue*, and remaining connective tissue in *green*. The software was then able to quantify these features 3-dimensionally, independent of any subjective, human interpretation. Carotid wall thickness was measured as the distance from the lumen-intima interface to the outer edge of the adventitia.

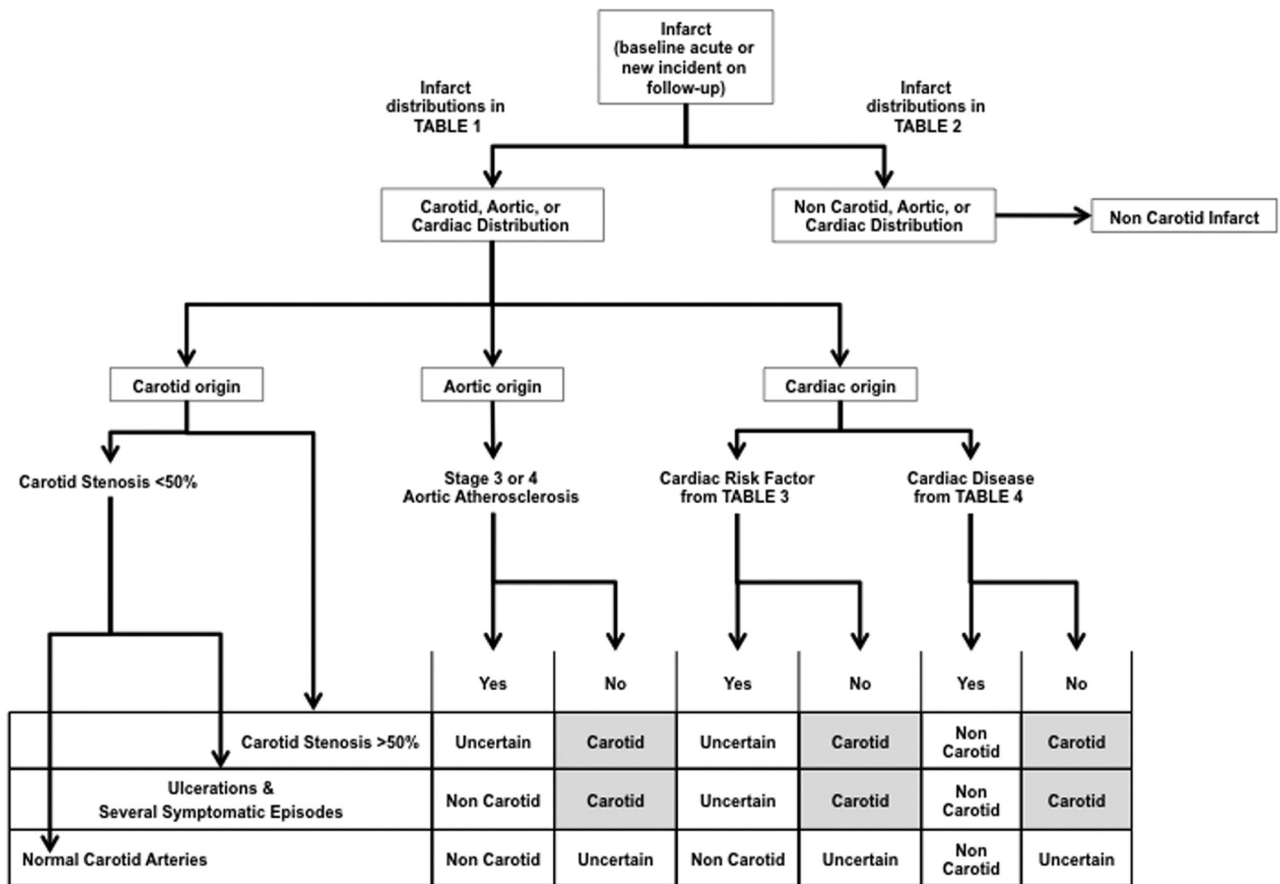

**On-line Fig 2.** Graphic depiction of the method used to differentiate “carotid infarcts” from “noncarotid infarcts.”

---

**On-line Table 1: Carotid, aortic, or cardiac infarct distributions**

---

Single, basal ganglia >15 mm  
Single, cortical lesion  
Single, corticosubcortical >15 mm  
Single, subcortical >15 mm  
Multiple, scattered lesions <15 mm in one vascular territory  
Multiple, unilateral lesions >15 mm in anterior circulation  
Multiple, unilateral lesions in anterior and posterior circulations, if PComA open on side of infarct

---

**Note:**—PComA indicates posterior communicating artery.

---

**On-line Table 2: Noncarotid, aortic, or cardiac infarct distributions**

---

Single, lacunar (basal ganglia or brain stem, <15 mm)  
Single, subcortical <15 mm (usually centrum semiovale)  
Multiple, unilateral lesions in posterior circulation  
Multiple, bilateral lesions, all or majority acute  
Multiple, bilateral lesions, all or all but one chronic/age-indeterminate  
Watershed (single or multiple)

---

---

**On-line Table 3: Cardiac risk factors**

---

Recent myocardial infarction  
Mitral annular calcification  
Rheumatic mitral valve  
Rheumatic aortic valve  
Bioprosthetic valve  
Mechanical valve  
Ejection fraction <30%  
Cardiomyopathy  
Endocarditis  
Patent foramen ovale

---

---

**On-line Table 4: Cardiac disease**

---

Atrial fibrillation  
Atrial flutter  
Sick sinus syndrome  
Cardiac thrombus

---
